# Supplementary material
Source: MDPI journal article supplement (https://www.mdpi.com/2311-7524/10/5/439)
Supplement: s1 [file s1]

Table S1. qRT-PCR primer sequence.

| Gene            | Primer                    |
|-----------------|---------------------------|
| LOC:103430380-F | CAAATCCGACTACCCATCA       |
| LOC:103430380-R | GACCGTTTAAGCCTCCTG        |
| LOC:103437824-F | GGTTGATGCGGTGATTGG        |
| LOC:103437824-R | CCTTGGCTCTGTTTCTTGTT      |
| LOC:103404203-F | ATTGTAAGGAACGGGACG        |
| LOC:103404203-R | TCTTGGGTGTCATCATCG        |
| MdPAO-F         | GTGGTTCCTAGATGGCAAGA      |
| MdPAO-R         | ATTGACGGTAAGGGTTGTTG      |
| MdNYC1-F        | GAGGAAAGTGCGAGAAAGCG      |
| MdNYC1-R        | CCACCTGACAACTGAAACCC      |
| MdPPH-F         | GAGATAGTGAAAGAACCGACAG    |
| MdPPH-R         | CCTCAGACTCCTTGGCTAC       |
| MdRCCR-F        | CCGAAGCGTAGTGTCTCC        |
| MdRCCR-R        | GATTCCCAGCACCTCCTT        |
| MdHCAR-F        | GAAGGCTGCGAGTAGTGA        |
| MdHCAR-R        | TACCGTAACATACTGTGGAT      |
| MdSGR2-F        | GGCTGCTGCTTCTGTGCTTCCT    |
| MdSGR2-R        | CCGAGCCACAACCTTCATCTCTTT  |
| MdActin-F       | TGACCGAATGAGCAAGGAAATTACT |
| MdActin-R       | TACTCAGCTTTGGCAATCCACATC  |

Table S2. Statistics of comparison between samples and reference genomes.

| Sample Name | Total reads | Total mapped reads | Total mapped (%) | Uniquely mapped reads | Uniquely mapped (%) | Multiply mapped reads | Multiply mapped (%) |
|-------------|-------------|--------------------|------------------|-----------------------|---------------------|-----------------------|---------------------|
| GDY1        | 48697818    | 45589210           | 93.62            | 44417120              | 91.21               | 1172090               | 2.41                |
| GDY2        | 42388050    | 40002999           | 94.37            | 38919532              | 91.82               | 1083467               | 2.56                |
| GDY3        | 50209792    | 47141972           | 93.89            | 45920511              | 91.46               | 1221461               | 2.43                |
| GSG1        | 46390926    | 42619369           | 91.87            | 41377590              | 89.19               | 1241779               | 2.68                |
| GSG2        | 43456306    | 40064564           | 92.20            | 38906834              | 89.53               | 1157730               | 2.66                |
| GSG3        | 53412110    | 48979276           | 91.70            | 47761426              | 89.42               | 1217850               | 2.28                |

Table S3. Differential genes in the metabolic pathways of porphyrin and chlorophyll.

| Gene id      | Gene description                                                    |
|--------------|---------------------------------------------------------------------|
| LOC103444548 | Glutamate--tRNA ligase%2C chloroplastic/mitochondrial               |
| LOC103448940 | NYC1                                                                |
| LOC103404203 | protoporphyrinogen oxidase%2C mitochondrial-like                    |
| LOC103424694 | uroporphyrinogen-III synthase%2C chloroplastic-like%2C              |
| LOC103400421 | heme oxygenase 1%2C chloroplastic-like                              |
| LOC103425927 | frataxin%2C mitochondrial                                           |
| LOC103434858 | magnesium-chelatase subunit ChII%2C chloroplastic-like              |
| LOC103410551 | ferrochelatase-2%2C chloroplastic-like                              |
| LOC103444879 | uroporphyrinogen decarboxylase 1%2C chloroplastic                   |
| LOC103448109 | heme oxygenase 1%2C chloroplastic-like                              |
| LOC103430380 | protochlorophyllide reductase%2C chloroplastic                      |
| LOC103437824 | geranylgeranyl diphosphate reductase%2C chloroplastic               |
| LOC103437475 | magnesium protoporphyrin IX methyltransferase%2C chloroplastic-like |
| LOC103402026 | glutamyl-tRNA reductase 1%2C chloroplastic-like                     |
| LOC103446341 | magnesium-chelatase subunit ChII%2C chloroplastic                   |
| LOC103424137 | HCAR                                                                |
| LOC103441572 | chlorophyllide a oxygenase%2C chloroplastic                         |
| LOC103431022 | magnesium-chelatase subunit ChIH%2C chloroplastic                   |
| LOC103424544 | geranylgeranyl diphosphate reductase%2C chloroplastic-like          |
| LOC103453222 | chlorophyllase-2%2C chloroplastic                                   |
| LOC103421204 | phospholipase SGR2-like%2C transcript variant X3                    |
| LOC103454888 | magnesium protoporphyrin IX methyltransferase%2C chloroplastic-like |
| LOC103434245 | ferrochelatase-2%2C chloroplastic-like                              |
